# Supplementary material for: The association reaction between C2H and 1-butyne: a computational chemical kinetics study
Source: Royal Society of Chemistry journal article supplement (doi:10.1039/c0cp02368j), 2011-01-01
Supplement: c0cp02368j.pdf [file c0cp02368j.pdf]

## Supporting Information for

### The association reaction between C<sub>2</sub>H and 1-butyne: A computational chemical kinetics study

Debasish Mandal, Bhaskar Mondal and Abhijit K. Das\*

*Department of Spectroscopy, Indian Association for the Cultivation of Science, Jadavpur,  
Kolkata 700032*

---

**Table S1** Optimized Cartesian coordinates at M06-2X/6-311++G(d,p) for all the species involved in the title reaction

---

#### C<sub>2</sub>H

Standard orientation:

| Atomic Number | Coordinates (Angstroms) |          |           |
|---------------|-------------------------|----------|-----------|
|               | X                       | Y        | Z         |
| 6             | 0.000000                | 0.000000 | -0.471867 |
| 1             | 0.000000                | 0.000000 | -1.537428 |
| 6             | 0.000000                | 0.000000 | 0.728105  |

#### CH<sub>3</sub>

Standard orientation:

| Atomic Number | Coordinates (Angstroms) |           |           |
|---------------|-------------------------|-----------|-----------|
|               | X                       | Y         | Z         |
| 6             | -0.000002               | 0.000037  | -0.000008 |
| 1             | 0.956513                | -0.498942 | 0.000017  |
| 1             | -0.910286               | -0.578995 | 0.000017  |
| 1             | -0.046216               | 1.077712  | 0.000017  |

### C<sub>2</sub>H<sub>5</sub>

Standard orientation:

| Atomic<br>Number | Coordinates (Angstroms) |           |           |
|------------------|-------------------------|-----------|-----------|
|                  | X                       | Y         | Z         |
| 6                | 0.694220                | 0.000020  | -0.000538 |
| 6                | -0.793661               | 0.000000  | -0.023691 |
| 1                | -1.348125               | -0.925395 | 0.051377  |
| 1                | -1.348221               | 0.925331  | 0.051396  |
| 1                | 1.103872                | -0.884448 | -0.493407 |
| 1                | 1.085303                | -0.001461 | 1.026956  |
| 1                | 1.103821                | 0.885852  | -0.490947 |

### 1-Butyne

Standard orientation:

| Atomic<br>Number | Coordinates (Angstroms) |           |           |
|------------------|-------------------------|-----------|-----------|
|                  | X                       | Y         | Z         |
| 6                | 1.949490                | -0.262969 | 0.000021  |
| 1                | 2.945320                | -0.636332 | 0.000352  |
| 6                | 0.827778                | 0.164671  | -0.000198 |
| 6                | -0.551374               | 0.653711  | 0.000064  |
| 6                | -1.571400               | -0.490826 | 0.000003  |
| 1                | -0.699008               | 1.289235  | 0.877515  |
| 1                | -0.699195               | 1.289501  | -0.877160 |
| 1                | -2.587832               | -0.094017 | 0.000152  |
| 1                | -1.443206               | -1.117832 | -0.883187 |
| 1                | -1.443044               | -1.118078 | 0.882994  |

## R1

Standard orientation:

| Atomic<br>Number | Coordinates (Angstroms) |           |           |
|------------------|-------------------------|-----------|-----------|
|                  | X                       | Y         | Z         |
| 6                | -2.377297               | -0.538201 | -0.443815 |
| 6                | -1.328677               | -0.156290 | 0.608292  |
| 6                | -0.445711               | 0.926719  | 0.146480  |
| 6                | 0.827090                | 1.079835  | -0.170378 |
| 6                | 1.768507                | 0.000955  | -0.087412 |
| 6                | 2.554455                | -0.906997 | -0.019535 |
| 1                | -1.892568               | -0.883194 | -1.358322 |
| 1                | -3.003719               | 0.319678  | -0.693610 |
| 1                | -3.019704               | -1.336742 | -0.069908 |
| 1                | 3.252497                | -1.707299 | 0.040145  |
| 1                | -1.824956               | 0.154560  | 1.533008  |
| 1                | -0.703486               | -1.025170 | 0.856577  |
| 1                | 1.201735                | 2.042042  | -0.509685 |

## R2

Standard orientation:

| Atomic<br>Number | Coordinates (Angstroms) |           |           |
|------------------|-------------------------|-----------|-----------|
|                  | X                       | Y         | Z         |
| 6                | -2.295970               | -0.695824 | -0.451314 |
| 6                | -1.270010               | -0.279986 | 0.552570  |
| 6                | -0.562079               | 0.973582  | 0.123458  |
| 6                | 0.740521                | 1.071001  | -0.163259 |
| 6                | 1.664080                | -0.016871 | -0.075649 |
| 6                | 2.461736                | -0.914974 | -0.011880 |
| 1                | -2.035204               | -0.729623 | -1.500884 |
| 1                | -1.177932               | 1.862080  | 0.014756  |
| 1                | -3.257458               | -1.082706 | -0.144294 |
| 1                | 3.165226                | -1.710654 | 0.046936  |
| 1                | -1.749426               | -0.108412 | 1.521572  |
| 1                | -0.526744               | -1.074464 | 0.702682  |
| 1                | 1.151870                | 2.022213  | -0.484328 |

### M1

Standard orientation:

| Atomic<br>Number | Coordinates (Angstroms) |           |           |
|------------------|-------------------------|-----------|-----------|
|                  | X                       | Y         | Z         |
| 6                | -2.628992               | 0.709403  | 0.000007  |
| 6                | -1.844945               | -0.609421 | 0.000101  |
| 6                | -0.401331               | -0.393440 | -0.000174 |
| 6                | 0.786747                | -0.185532 | -0.000091 |
| 6                | 2.143565                | 0.045040  | -0.000020 |
| 6                | 3.330077                | 0.246843  | 0.000082  |
| 1                | -2.384136               | 1.300273  | 0.883276  |
| 1                | -3.701520               | 0.509939  | 0.000227  |
| 1                | -2.384448               | 1.299945  | -0.883568 |
| 1                | 4.378735                | 0.424651  | 0.000112  |
| 1                | -2.109863               | -1.206232 | -0.877424 |
| 1                | -2.109496               | -1.205932 | 0.877942  |

### M2

Standard orientation:

| Atomic<br>Number | Coordinates (Angstroms) |           |           |
|------------------|-------------------------|-----------|-----------|
|                  | X                       | Y         | Z         |
| 6                | -2.611771               | -0.591713 | -0.299453 |
| 6                | -1.620161               | 0.193495  | 0.519025  |
| 6                | -0.421036               | 0.503334  | 0.123184  |
| 6                | 0.785148                | 0.820573  | -0.285225 |
| 6                | 1.929101                | -0.009632 | -0.066579 |
| 6                | 2.908983                | -0.684631 | 0.100807  |
| 1                | -2.189859               | -0.866206 | -1.265319 |
| 1                | -3.518224               | -0.004869 | -0.465136 |
| 1                | -2.899710               | -1.503226 | 0.229246  |
| 1                | 3.771371                | -1.287653 | 0.254084  |
| 1                | -1.927737               | 0.517101  | 1.511535  |
| 1                | 0.942575                | 1.756299  | -0.814965 |

IM  
Standard orientation:

| Atomic<br>Number | Coordinates (Angstroms) |           |           |
|------------------|-------------------------|-----------|-----------|
|                  | X                       | Y         | Z         |
| 6                | -2.029325               | 0.725872  | -0.349145 |
| 6                | -1.399908               | -0.419655 | 0.450519  |
| 6                | 0.033717                | -0.570903 | 0.120733  |
| 6                | 1.066379                | -1.271001 | -0.282396 |
| 6                | 1.314107                | 0.127321  | 0.002474  |
| 6                | 2.090755                | 1.164963  | 0.078252  |
| 1                | -1.979812               | 0.522824  | -1.420003 |
| 1                | -1.500278               | 1.660779  | -0.157330 |
| 1                | -3.075825               | 0.855340  | -0.070849 |
| 1                | 2.019589                | 2.204019  | 0.345535  |
| 1                | -1.475481               | -0.205528 | 1.521376  |
| 1                | -1.918731               | -1.362839 | 0.265178  |
| 1                | 1.476191                | -2.214180 | -0.606526 |

IM1

Standard orientation:

| Atomic<br>Number | Coordinates (Angstroms) |           |           |
|------------------|-------------------------|-----------|-----------|
|                  | X                       | Y         | Z         |
| 6                | -2.861604               | 0.344355  | 0.000027  |
| 6                | -1.573101               | -0.394245 | 0.000057  |
| 6                | -0.343159               | 0.172108  | -0.000073 |
| 6                | 0.791410                | -0.698283 | -0.000065 |
| 6                | 2.032371                | -0.095030 | -0.000049 |
| 6                | 3.172752                | 0.335358  | 0.000075  |
| 1                | -2.714736               | 1.423939  | -0.000087 |
| 1                | -3.453702               | 0.061317  | 0.875927  |
| 1                | -3.453783               | 0.061143  | -0.875765 |
| 1                | 4.176705                | 0.687729  | 0.000177  |
| 1                | -1.606622               | -1.481530 | 0.000132  |
| 1                | -0.259867               | 1.261824  | -0.000207 |

### M3

Standard orientation:

| Atomic<br>Number | Coordinates (Angstroms) |           |           |
|------------------|-------------------------|-----------|-----------|
|                  | X                       | Y         | Z         |
| 6                | -2.560606               | -0.574439 | -0.000001 |
| 6                | -1.233920               | -0.429708 | 0.000001  |
| 6                | -0.581820               | 0.871027  | 0.000000  |
| 6                | 0.747956                | 1.062543  | 0.000001  |
| 6                | 1.705810                | 0.005832  | -0.000002 |
| 6                | 2.531358                | -0.869253 | 0.000001  |
| 1                | -3.220242               | 0.287460  | -0.000004 |
| 1                | -1.227414               | 1.744659  | 0.000000  |
| 1                | -3.023917               | -1.553024 | 0.000003  |
| 1                | 3.260275                | -1.643910 | -0.000003 |
| 1                | -0.587350               | -1.302437 | 0.000004  |
| 1                | 1.145985                | 2.071239  | 0.000001  |

### M4

Standard orientation:

| Atomic<br>Number | Coordinates (Angstroms) |           |           |
|------------------|-------------------------|-----------|-----------|
|                  | X                       | Y         | Z         |
| 6                | -2.258961               | -0.445992 | 0.000007  |
| 6                | -1.107426               | 0.153821  | 0.000000  |
| 6                | 0.049791                | 0.770113  | -0.000021 |
| 6                | 1.301828                | 0.080790  | -0.000016 |
| 6                | 2.368663                | -0.471449 | -0.000017 |
| 1                | 3.309069                | -0.968130 | 0.000142  |
| 1                | -2.752338               | -0.705923 | 0.930382  |
| 1                | -2.752340               | -0.705902 | -0.930374 |
| 1                | 0.072239                | 1.856254  | 0.000127  |

### M5

Standard orientation:

| Atomic<br>Number | Coordinates (Angstroms) |           |           |
|------------------|-------------------------|-----------|-----------|
|                  | X                       | Y         | Z         |
| 6                | -2.515698               | -0.000455 | 0.000101  |
| 6                | -1.059578               | 0.000578  | -0.000135 |
| 6                | 0.145586                | 0.000778  | -0.000274 |
| 6                | 1.521905                | 0.000142  | 0.000011  |
| 6                | 2.725279                | -0.000413 | 0.000109  |
| 1                | 3.788839                | -0.001164 | 0.000254  |
| 1                | -2.897568               | -0.659730 | -0.781547 |
| 1                | -2.899020               | 1.005711  | -0.179325 |
| 1                | -2.897218               | -0.348593 | 0.961745  |

### IM2

Standard orientation:

| Atomic<br>Number | Coordinates (Angstroms) |           |           |
|------------------|-------------------------|-----------|-----------|
|                  | X                       | Y         | Z         |
| 6                | -2.301166               | -0.030721 | 0.000462  |
| 6                | -1.024410               | 0.394101  | -0.000466 |
| 6                | 0.012585                | -0.607832 | -0.000504 |
| 6                | 1.309419                | -0.146980 | -0.000234 |
| 6                | 2.491120                | 0.155682  | 0.000418  |
| 1                | 3.529430                | 0.389659  | 0.001006  |
| 1                | -2.504686               | -1.096169 | 0.000890  |
| 1                | -3.140871               | 0.657341  | 0.000920  |
| 1                | -0.809156               | 1.463673  | -0.000867 |

### R3

Standard orientation:

| Atomic<br>Number | Coordinates (Angstroms) |           |           |
|------------------|-------------------------|-----------|-----------|
|                  | X                       | Y         | Z         |
| 6                | -1.767306               | -0.941749 | -0.392904 |
| 6                | -1.225698               | 0.136026  | 0.547338  |
| 6                | 0.124909                | 0.654591  | 0.094452  |
| 6                | 0.329777                | 1.906365  | -0.265965 |
| 6                | 1.211522                | -0.288267 | 0.050104  |
| 6                | 2.104441                | -1.093390 | 0.024813  |
| 1                | 2.901151                | -1.797828 | -0.000615 |
| 1                | 1.171802                | 2.484392  | -0.616277 |
| 1                | -1.914439               | 0.981255  | 0.603429  |
| 1                | -1.115446               | -0.271426 | 1.556825  |
| 1                | -1.901895               | -0.539642 | -1.399081 |
| 1                | -2.730304               | -1.312864 | -0.037917 |
| 1                | -1.076745               | -1.785343 | -0.453384 |

### R4

Standard orientation:

| Atomic<br>Number | Coordinates (Angstroms) |           |           |
|------------------|-------------------------|-----------|-----------|
|                  | X                       | Y         | Z         |
| 6                | -2.319153               | -0.475918 | -0.000099 |
| 6                | -0.854810               | -0.764400 | 0.000155  |
| 6                | 0.118783                | 0.240250  | 0.000287  |
| 6                | -0.177167               | 1.590555  | 0.000089  |
| 6                | 1.503282                | -0.164652 | -0.000305 |
| 6                | 2.654952                | -0.506706 | -0.000159 |
| 1                | 3.674634                | -0.809443 | 0.001052  |
| 1                | 0.611566                | 2.329162  | -0.000462 |
| 1                | -1.202378               | 1.935914  | -0.000011 |
| 1                | -0.519502               | -1.793858 | -0.000014 |
| 1                | -2.608695               | 0.109007  | 0.880188  |
| 1                | -2.902458               | -1.395466 | -0.000748 |
| 1                | -2.608491               | 0.109904  | -0.879804 |



## R5

Standard orientation:

| Atomic<br>Number | Coordinates (Angstroms) |           |           |
|------------------|-------------------------|-----------|-----------|
|                  | X                       | Y         | Z         |
| 6                | -1.325365               | -1.264919 | -0.281318 |
| 6                | -0.609607               | -0.162394 | 0.483334  |
| 6                | 0.845705                | 0.109024  | 0.044578  |
| 6                | 1.956798                | -0.608932 | 0.001942  |
| 6                | 0.381312                | 1.453241  | -0.313608 |
| 6                | -0.892179               | 1.284138  | 0.040629  |
| 1                | -1.789563               | 1.885273  | 0.037034  |
| 1                | 2.879474                | -0.190821 | -0.381853 |
| 1                | 1.967442                | -1.635547 | 0.349545  |
| 1                | -0.684844               | -0.291572 | 1.567451  |
| 1                | -1.200030               | -1.118756 | -1.356570 |
| 1                | -2.393568               | -1.265736 | -0.052235 |
| 1                | -0.918893               | -2.243796 | -0.016717 |

## R6

Standard orientation:

| Atomic<br>Number | Coordinates (Angstroms) |           |           |
|------------------|-------------------------|-----------|-----------|
|                  | X                       | Y         | Z         |
| 6                | -1.919162               | -0.713140 | 0.000070  |
| 6                | -0.677413               | 0.094120  | 0.000012  |
| 6                | 0.774598                | -0.258332 | -0.000029 |
| 6                | 1.477257                | -1.386431 | -0.000069 |
| 6                | 1.046744                | 1.203704  | 0.000161  |
| 6                | -0.338519               | 1.452562  | -0.000169 |
| 1                | -0.930252               | 2.359257  | -0.000296 |
| 1                | 2.560186                | -1.375712 | 0.000003  |
| 1                | 0.979494                | -2.349233 | -0.000138 |
| 1                | 1.938481                | 1.810747  | 0.000319  |
| 1                | -1.962937               | -1.363038 | -0.880248 |
| 1                | -2.803073               | -0.073996 | 0.000036  |
| 1                | -1.962927               | -1.362935 | 0.880465  |

### R7

Standard orientation:

| Atomic<br>Number | Coordinates (Angstroms) |           |           |
|------------------|-------------------------|-----------|-----------|
|                  | X                       | Y         | Z         |
| 6                | -1.638890               | -1.204860 | -0.418212 |
| 6                | -1.257629               | -0.089475 | 0.496671  |
| 6                | 0.027423                | 0.594900  | 0.080814  |
| 6                | 0.093588                | 1.886403  | -0.248144 |
| 6                | 1.199312                | -0.235240 | 0.051548  |
| 6                | 2.153969                | -0.966233 | 0.041667  |
| 1                | 3.007083                | -1.601883 | 0.030654  |
| 1                | 1.029461                | 2.344971  | -0.541295 |
| 1                | -2.056517               | 0.655313  | 0.551637  |
| 1                | -1.120087               | -0.472147 | 1.520816  |
| 1                | -0.794699               | 2.507204  | -0.228794 |
| 1                | -2.658437               | -1.563793 | -0.440344 |
| 1                | -0.873448               | -1.782637 | -0.918736 |

### R8

Standard orientation:

| Atomic<br>Number | Coordinates (Angstroms) |           |           |
|------------------|-------------------------|-----------|-----------|
|                  | X                       | Y         | Z         |
| 6                | 1.511179                | 0.588855  | -0.000174 |
| 6                | 0.058848                | 1.141676  | 0.000166  |
| 6                | -0.858194               | -0.083268 | 0.000036  |
| 6                | -2.189941               | -0.094828 | -0.000110 |
| 6                | 0.049470                | -1.218305 | 0.000107  |
| 6                | 1.338234                | -0.921491 | 0.000024  |
| 1                | 2.167497                | -1.616504 | 0.000032  |
| 1                | -2.739565               | -1.027671 | -0.000159 |
| 1                | -0.136554               | 1.755616  | 0.880768  |
| 1                | -0.136856               | 1.756131  | -0.880006 |
| 1                | -2.759643               | 0.826981  | -0.000179 |
| 1                | 2.073519                | 0.914699  | -0.879171 |
| 1                | 2.074027                | 0.914919  | 0.878413  |

### R9

Standard orientation:

| Atomic<br>Number | Coordinates (Angstroms) |           |           |
|------------------|-------------------------|-----------|-----------|
|                  | X                       | Y         | Z         |
| 6                | 1.478116                | -0.689950 | 0.000034  |
| 6                | 0.049734                | -1.138249 | -0.000015 |
| 6                | -0.800554               | -0.027787 | -0.000031 |
| 6                | -2.180080               | -0.020593 | -0.000015 |
| 6                | 0.066282                | 1.172435  | 0.000067  |
| 6                | 1.353705                | 0.812407  | -0.000086 |
| 1                | 2.204151                | 1.480758  | -0.000144 |
| 1                | -2.735280               | 0.908155  | 0.000033  |
| 1                | -0.270392               | -2.170793 | -0.000015 |
| 1                | -0.317174               | 2.184780  | 0.000123  |
| 1                | -2.742247               | -0.945325 | -0.000023 |
| 1                | 2.028751                | -1.053488 | 0.877447  |
| 1                | 2.028974                | -1.053663 | -0.877148 |

### M6

Standard orientation:

| Atomic<br>Number | Coordinates (Angstroms) |           |           |
|------------------|-------------------------|-----------|-----------|
|                  | X                       | Y         | Z         |
| 6                | 0.688519                | -0.000314 | -0.000118 |
| 6                | 1.890909                | 0.000375  | -0.000038 |
| 6                | -0.688519               | -0.000367 | 0.000013  |
| 6                | -1.890909               | 0.000020  | 0.000078  |
| 1                | -2.954870               | 0.001575  | -0.000120 |
| 1                | 2.954871                | 0.000139  | 0.000510  |

### M7

Standard orientation:

| Atomic<br>Number | Coordinates (Angstroms) |           |           |
|------------------|-------------------------|-----------|-----------|
|                  | X                       | Y         | Z         |
| 6                | 1.621479                | -1.278365 | -0.000002 |
| 6                | 1.356296                | 0.025648  | 0.000026  |
| 6                | 0.003032                | 0.608065  | -0.000004 |
| 6                | -0.189476               | 1.934353  | 0.000023  |
| 6                | -1.120222               | -0.288934 | -0.000081 |
| 6                | -2.043688               | -1.057355 | -0.000124 |
| 1                | -2.870215               | -1.727131 | 0.000860  |
| 1                | -1.184401               | 2.359144  | -0.000004 |
| 1                | 2.166727                | 0.748954  | 0.000075  |
| 1                | 0.656626                | 2.611553  | 0.000068  |
| 1                | 2.642095                | -1.639291 | 0.000023  |
| 1                | 0.824644                | -2.013702 | -0.000050 |

### IM3

Standard orientation:

| Atomic<br>Number | Coordinates (Angstroms) |           |           |
|------------------|-------------------------|-----------|-----------|
|                  | X                       | Y         | Z         |
| 6                | -1.149326               | 1.430811  | 0.121158  |
| 6                | -0.482961               | 0.156245  | -0.322381 |
| 6                | 0.891059                | -0.170777 | -0.038486 |
| 6                | 2.158674                | 0.254105  | -0.107167 |
| 6                | 0.007868                | -1.009253 | 0.700972  |
| 6                | -1.139576               | -1.164865 | -0.272100 |
| 1                | -2.144960               | -1.187148 | 0.140846  |
| 1                | 2.911867                | -0.177621 | 0.538012  |
| 1                | 2.446676                | 1.026530  | -0.807299 |
| 1                | -0.966688               | -1.901121 | -1.052224 |
| 1                | -2.025583               | 1.210609  | 0.737931  |
| 1                | -1.483360               | 2.007155  | -0.744464 |
| 1                | -0.452385               | 2.044000  | 0.695224  |

### M8

Standard orientation:

| Atomic<br>Number | Coordinates (Angstroms) |           |           |
|------------------|-------------------------|-----------|-----------|
|                  | X                       | Y         | Z         |
| 6                | 1.700648                | -1.068291 | 0.000067  |
| 6                | 0.753971                | -0.138887 | 0.000019  |
| 6                | -0.753980               | -0.138877 | -0.000019 |
| 6                | -1.700652               | -1.068286 | -0.000067 |
| 6                | -0.676348               | 1.340994  | 0.000145  |
| 6                | 0.676359                | 1.340984  | -0.000145 |
| 1                | 1.425981                | 2.120823  | -0.000270 |
| 1                | -2.750980               | -0.802807 | -0.000012 |
| 1                | -1.443620               | -2.120936 | -0.000122 |
| 1                | -1.425961               | 2.120842  | 0.000270  |
| 1                | 1.443630                | -2.120944 | 0.000122  |
| 1                | 2.750972                | -0.802796 | 0.000012  |

### M9

Standard orientation:

| Atomic<br>Number | Coordinates (Angstroms) |           |           |
|------------------|-------------------------|-----------|-----------|
|                  | X                       | Y         | Z         |
| 6                | -1.399073               | 0.738188  | 0.000135  |
| 6                | -0.126322               | 1.178225  | -0.000180 |
| 6                | 0.759236                | -0.000048 | -0.000326 |
| 6                | 2.095799                | -0.000004 | 0.000262  |
| 6                | -0.126352               | -1.178206 | -0.000224 |
| 6                | -1.399091               | -0.738161 | 0.000151  |
| 1                | -2.290659               | -1.350220 | 0.000470  |
| 1                | 2.658293                | -0.927066 | 0.000430  |
| 1                | 0.219848                | 2.201783  | -0.000447 |
| 1                | 0.219774                | -2.201778 | -0.000318 |
| 1                | 2.658218                | 0.927105  | 0.000525  |
| 1                | -2.290660               | 1.350211  | 0.000439  |

### TS1

Standard orientation:

| Atomic<br>Number | Coordinates (Angstroms) |           |           |
|------------------|-------------------------|-----------|-----------|
|                  | X                       | Y         | Z         |
| 6                | -2.648881               | 0.722369  | 0.145601  |
| 6                | -1.859621               | -0.541901 | -0.219154 |
| 6                | -0.419608               | -0.340575 | -0.142316 |
| 6                | 0.778188                | -0.284313 | 0.086622  |
| 6                | 2.116201                | 0.067663  | -0.005075 |
| 6                | 3.278921                | 0.365306  | -0.075968 |
| 1                | -2.405051               | 1.537667  | -0.536141 |
| 1                | -2.410867               | 1.042292  | 1.160433  |
| 1                | -3.720073               | 0.526047  | 0.084345  |
| 1                | 4.306480                | 0.631721  | -0.142754 |
| 1                | -2.125125               | -1.362767 | 0.457405  |
| 1                | -2.117753               | -0.871737 | -1.229621 |
| 1                | 1.001196                | -1.434518 | 1.468066  |

### TS2

Standard orientation:

| Atomic<br>Number | Coordinates (Angstroms) |           |           |
|------------------|-------------------------|-----------|-----------|
|                  | X                       | Y         | Z         |
| 6                | -2.585537               | -0.420028 | -0.472655 |
| 6                | -1.557788               | 0.042929  | 0.537181  |
| 6                | -0.389411               | 0.546955  | 0.196932  |
| 6                | 0.823944                | 0.922023  | -0.124927 |
| 6                | 1.941641                | 0.027880  | -0.084233 |
| 6                | 2.893135                | -0.705376 | -0.058167 |
| 1                | -2.109194               | -0.667650 | -1.420390 |
| 1                | -3.318104               | 0.371932  | -0.645134 |
| 1                | -3.113915               | -1.299463 | -0.103593 |
| 1                | 3.730610                | -1.360626 | -0.031947 |
| 1                | -1.893186               | 0.202735  | 1.559973  |
| 1                | 1.013924                | 1.946367  | -0.436740 |
| 1                | -1.066039               | -1.679589 | 1.113041  |

### TS3

Standard orientation:

| Atomic<br>Number | Coordinates (Angstroms) |           |           |
|------------------|-------------------------|-----------|-----------|
|                  | X                       | Y         | Z         |
| 6                | 2.340188                | -0.130562 | 0.450830  |
| 6                | 1.216555                | -0.789276 | -0.348847 |
| 6                | 0.587379                | 0.558591  | -0.413984 |
| 6                | -0.617733               | 1.020606  | -0.055560 |
| 6                | -1.736732               | 0.141927  | 0.064654  |
| 6                | -2.671581               | -0.610412 | 0.164044  |
| 1                | 2.267604                | -0.172129 | 1.532087  |
| 1                | 1.777874                | 1.058193  | 0.053980  |
| 1                | 3.341319                | -0.123597 | 0.029558  |
| 1                | -3.501207               | -1.270332 | 0.249396  |
| 1                | 1.553416                | -1.164290 | -1.315182 |
| 1                | 0.635630                | -1.551785 | 0.170378  |
| 1                | -0.783095               | 2.078698  | 0.112962  |

### TS4

Standard orientation:

| Atomic<br>Number | Coordinates (Angstroms) |           |           |
|------------------|-------------------------|-----------|-----------|
|                  | X                       | Y         | Z         |
| 6                | -3.119933               | -0.499228 | -0.001383 |
| 6                | -1.395409               | 0.932250  | 0.000445  |
| 6                | -0.250200               | 0.262116  | 0.002051  |
| 6                | 0.753539                | -0.579777 | 0.001616  |
| 6                | 2.128013                | -0.179356 | 0.000145  |
| 6                | 3.290873                | 0.124246  | -0.001579 |
| 1                | -2.970708               | -1.000059 | 0.946114  |
| 1                | -2.906450               | -1.073673 | -0.893152 |
| 1                | -3.946445               | 0.198722  | -0.058343 |
| 1                | 4.317393                | 0.402697  | -0.003141 |
| 1                | -1.743307               | 1.379987  | -0.924731 |
| 1                | -1.745855               | 1.382434  | 0.923461  |
| 1                | 0.554074                | -1.651610 | 0.002019  |

### TS5

Standard orientation:

| Atomic<br>Number | Coordinates (Angstroms) |           |           |
|------------------|-------------------------|-----------|-----------|
|                  | X                       | Y         | Z         |
| 6                | 2.544189                | -0.539426 | -0.109000 |
| 1                | 3.197415                | 0.320934  | -0.014405 |
| 1                | 1.198793                | 1.770865  | 0.055225  |
| 1                | 3.009564                | -1.509016 | -0.230042 |
| 6                | 1.200544                | -0.409304 | -0.024621 |
| 1                | 0.776544                | -0.819870 | 1.742859  |
| 1                | 0.561792                | -1.265327 | -0.221898 |
| 6                | 0.548910                | 0.902084  | 0.011818  |
| 6                | -0.778953               | 1.089973  | -0.012890 |
| 1                | -1.184347               | 2.095241  | 0.002146  |
| 1                | -3.224327               | -1.676546 | -0.050662 |
| 6                | -2.517577               | -0.881527 | -0.043395 |
| 6                | -1.719685               | 0.018820  | -0.035782 |

### TS6

Standard orientation:

| Atomic<br>Number | Coordinates (Angstroms) |           |           |
|------------------|-------------------------|-----------|-----------|
|                  | X                       | Y         | Z         |
| 6                | -2.840522               | 0.449066  | -0.069136 |
| 6                | -1.692898               | -0.454088 | 0.263758  |
| 6                | -0.373736               | -0.197245 | -0.080015 |
| 6                | 0.846430                | -0.422300 | -0.442296 |
| 6                | 2.099020                | -0.000718 | -0.078125 |
| 6                | 3.245598                | 0.298851  | 0.181678  |
| 1                | -2.510139               | 1.328493  | -0.622563 |
| 1                | -3.396026               | 0.765352  | 0.817661  |
| 1                | -3.541275               | -0.104859 | -0.703538 |
| 1                | 4.249847                | 0.563499  | 0.409821  |
| 1                | -1.907883               | -1.332466 | 0.872080  |
| 1                | -0.597876               | 0.738582  | 0.571351  |



### TS7

Standard orientation:

| Atomic<br>Number | Coordinates (Angstroms) |           |           |
|------------------|-------------------------|-----------|-----------|
|                  | X                       | Y         | Z         |
| 6                | 2.734592                | 0.529901  | -0.115636 |
| 6                | 1.626220                | -0.320609 | 0.436235  |
| 6                | 0.394220                | -0.369067 | -0.036827 |
| 6                | -0.853077               | -0.726831 | -0.401807 |
| 6                | -2.000623               | -0.007441 | -0.057004 |
| 6                | -3.069545               | 0.496375  | 0.198180  |
| 1                | 2.404045                | 1.095405  | -0.988365 |
| 1                | 3.586320                | -0.086628 | -0.413972 |
| 1                | 3.092708                | 1.242784  | 0.631254  |
| 1                | -4.002038               | 0.951737  | 0.432059  |
| 1                | 1.831517                | -0.944901 | 1.299956  |
| 1                | 0.096729                | 0.127636  | -1.099780 |

### TS8

Standard orientation:

| Atomic<br>Number | Coordinates (Angstroms) |           |           |
|------------------|-------------------------|-----------|-----------|
|                  | X                       | Y         | Z         |
| 6                | -2.474117               | -0.279065 | -0.407315 |
| 6                | -1.382779               | -0.560458 | 0.481334  |
| 6                | -0.579845               | 0.509717  | 0.258410  |
| 6                | 0.668986                | 0.960873  | 0.069633  |
| 6                | 1.781408                | 0.081700  | -0.063042 |
| 6                | 2.730722                | -0.651044 | -0.172700 |
| 1                | -3.148823               | 0.520705  | -0.122842 |
| 1                | -1.578666               | 0.865722  | -0.663778 |
| 1                | -2.935751               | -1.055190 | -1.018896 |
| 1                | 3.567277                | -1.300692 | -0.266430 |
| 1                | -1.222986               | -1.423710 | 1.118370  |
| 1                | 0.852698                | 2.022825  | -0.044334 |

### TS9

Standard orientation:

| Atomic<br>Number | Coordinates (Angstroms) |           |           |
|------------------|-------------------------|-----------|-----------|
|                  | X                       | Y         | Z         |
| 6                | 2.325466                | -0.348186 | -0.015058 |
| 6                | 1.092557                | 0.124876  | 0.045859  |
| 6                | -0.097175               | 0.686857  | -0.218188 |
| 6                | -1.336230               | 0.076266  | -0.033760 |
| 6                | -2.465594               | -0.347408 | 0.046830  |
| 1                | -3.452634               | -0.737139 | 0.123491  |
| 1                | 2.706993                | -0.703909 | -0.962529 |
| 1                | 2.953394                | -0.405162 | 0.860603  |
| 1                | 0.678106                | 0.691776  | 1.024337  |

### TS10

Standard orientation:

| Atomic<br>Number | Coordinates (Angstroms) |           |           |
|------------------|-------------------------|-----------|-----------|
|                  | X                       | Y         | Z         |
| 6                | -2.453498               | 0.015858  | 0.151770  |
| 6                | -1.098505               | 0.014203  | -0.148305 |
| 6                | 0.118443                | -0.371061 | -0.262381 |
| 6                | 1.423143                | -0.061756 | -0.035453 |
| 6                | 2.607349                | 0.133262  | 0.144290  |
| 1                | 3.644349                | 0.307764  | 0.303088  |
| 1                | -2.834635               | -0.499521 | 1.027800  |
| 1                | -3.126990               | 0.653599  | -0.404442 |
| 1                | -1.264311               | 1.155122  | -0.025966 |

### TS11

Standard orientation:

| Atomic<br>Number | Coordinates (Angstroms) |           |           |
|------------------|-------------------------|-----------|-----------|
|                  | X                       | Y         | Z         |
| 6                | -1.821731               | -1.080197 | -0.316219 |
| 6                | -1.160125               | -0.032316 | 0.537408  |
| 6                | 0.169483                | 0.520570  | 0.087494  |
| 6                | -0.223860               | 1.748304  | -0.226971 |
| 6                | 1.421925                | -0.149251 | 0.021054  |
| 6                | 2.462163                | -0.751390 | -0.023867 |
| 1                | 3.387772                | -1.274117 | -0.066019 |
| 1                | 0.238167                | 2.652582  | -0.615554 |
| 1                | -1.490239               | 1.274676  | 0.205437  |
| 1                | -1.277912               | -0.124997 | 1.617675  |
| 1                | -1.831840               | -0.770038 | -1.363939 |
| 1                | -2.846636               | -1.268722 | 0.005835  |
| 1                | -1.266439               | -2.023701 | -0.256822 |

### TS12

Standard orientation:

| Atomic<br>Number | Coordinates (Angstroms) |           |           |
|------------------|-------------------------|-----------|-----------|
|                  | X                       | Y         | Z         |
| 6                | -2.231498               | -0.232109 | 0.000003  |
| 6                | -0.876174               | -0.928883 | -0.000003 |
| 6                | 0.134155                | 0.211873  | -0.000001 |
| 6                | -0.428159               | 1.416581  | -0.000001 |
| 6                | 1.539677                | -0.039253 | -0.000001 |
| 6                | 2.717144                | -0.284986 | 0.000002  |
| 1                | 3.760957                | -0.490090 | 0.000004  |
| 1                | -0.017919               | 2.418016  | -0.000002 |
| 1                | -0.727593               | -1.560908 | 0.879021  |
| 1                | -0.727597               | -1.560902 | -0.879031 |
| 1                | -1.768139               | 0.990133  | -0.000002 |
| 1                | -2.825283               | -0.327791 | 0.905495  |
| 1                | -2.825297               | -0.327800 | -0.905479 |

### TS13

Standard orientation:

| Atomic<br>Number | Coordinates (Angstroms) |           |           |
|------------------|-------------------------|-----------|-----------|
|                  | X                       | Y         | Z         |
| 6                | -1.797920               | -0.891312 | -0.451518 |
| 6                | -1.358934               | -0.009126 | 0.671783  |
| 6                | 0.547781                | 0.863570  | -0.015009 |
| 6                | 0.450838                | 2.071655  | -0.224090 |
| 6                | 1.284290                | -0.319593 | 0.005017  |
| 6                | 1.889439                | -1.358819 | 0.029891  |
| 1                | 2.444559                | -2.266150 | 0.045355  |
| 1                | 0.108856                | 3.076015  | -0.320926 |
| 1                | -1.909677               | 0.909527  | 0.838621  |
| 1                | -0.976791               | -0.478713 | 1.572369  |
| 1                | -1.949155               | -0.318278 | -1.369104 |
| 1                | -2.748194               | -1.386539 | -0.214029 |
| 1                | -1.062568               | -1.674112 | -0.648726 |

### TS14

Standard orientation:

| Atomic<br>Number | Coordinates (Angstroms) |           |           |
|------------------|-------------------------|-----------|-----------|
|                  | X                       | Y         | Z         |
| 6                | 1.931963                | -0.331416 | -0.267437 |
| 6                | 0.647772                | -0.341548 | 0.497508  |
| 6                | -0.461453               | 0.599621  | 0.112625  |
| 6                | -0.447633               | 1.918713  | -0.047255 |
| 6                | -1.498565               | -0.389955 | -0.159068 |
| 6                | -1.086514               | -1.576568 | -0.097485 |
| 1                | -1.103778               | -2.646974 | -0.151760 |
| 1                | -1.329433               | 2.450852  | -0.380516 |
| 1                | 0.450764                | 2.491234  | 0.153139  |
| 1                | 0.663895                | -0.620594 | 1.547285  |
| 1                | 1.740682                | -0.350300 | -1.343218 |
| 1                | 2.562553                | -1.181258 | -0.003024 |
| 1                | 2.501899                | 0.583966  | -0.055232 |

### TS15

Standard orientation:

| Atomic<br>Number | Coordinates (Angstroms) |           |           |
|------------------|-------------------------|-----------|-----------|
|                  | X                       | Y         | Z         |
| 6                | 1.754289                | -0.986175 | 0.129350  |
| 6                | 0.636794                | -0.065805 | -0.195402 |
| 6                | -0.831924               | -0.113274 | -0.069738 |
| 6                | -1.739202               | -1.086574 | -0.022785 |
| 6                | -0.923087               | 1.360738  | 0.252389  |
| 6                | 0.485258                | 1.452598  | -0.037727 |
| 1                | 1.227925                | 2.221713  | 0.143451  |
| 1                | -2.769318               | -0.844066 | 0.214051  |
| 1                | -1.481291               | -2.125670 | -0.200628 |
| 1                | 0.582904                | 1.050288  | -1.156408 |
| 1                | 1.856293                | -1.100009 | 1.217095  |
| 1                | 2.701513                | -0.596515 | -0.250202 |
| 1                | 1.589202                | -1.974789 | -0.303881 |

### TS16

Standard orientation:

| Atomic<br>Number | Coordinates (Angstroms) |           |           |
|------------------|-------------------------|-----------|-----------|
|                  | X                       | Y         | Z         |
| 6                | -1.885857               | -0.821229 | 0.002056  |
| 6                | -0.664684               | 0.017692  | -0.018212 |
| 6                | 0.770200                | -0.227064 | 0.012006  |
| 6                | 1.587753                | -1.282891 | 0.008535  |
| 6                | 1.107338                | 1.266851  | -0.102291 |
| 6                | -0.343030               | 1.461074  | -0.030928 |
| 1                | -0.933802               | 2.349789  | -0.236987 |
| 1                | 2.660144                | -1.126356 | 0.001581  |
| 1                | 1.215777                | -2.301982 | -0.006288 |
| 1                | 0.259238                | 1.723969  | 0.988396  |
| 1                | -2.563368               | -0.562518 | -0.817630 |
| 1                | -2.446321               | -0.693694 | 0.935691  |
| 1                | -1.621990               | -1.875802 | -0.091762 |

### TS17

Standard orientation:

| Atomic<br>Number | Coordinates (Angstroms) |           |           |
|------------------|-------------------------|-----------|-----------|
|                  | X                       | Y         | Z         |
| 6                | -1.795769               | -0.749096 | -0.178207 |
| 6                | -0.705519               | 0.018604  | -0.105424 |
| 6                | 0.775368                | -0.233471 | -0.013375 |
| 6                | 1.552954                | -1.307982 | -0.003815 |
| 6                | 0.938651                | 1.238211  | 0.067237  |
| 6                | -0.395010               | 1.459345  | -0.015909 |
| 1                | -1.009138               | 2.349695  | -0.014846 |
| 1                | 2.629767                | -1.223851 | 0.078639  |
| 1                | 1.125996                | -2.301017 | -0.078435 |
| 1                | 1.801585                | 1.883988  | 0.157675  |
| 1                | -1.708234               | -1.825894 | -0.259897 |
| 1                | -2.784904               | -0.315403 | -0.260211 |
| 1                | -2.279129               | -1.121180 | 1.874028  |

### TS18

Standard orientation:

| Atomic<br>Number | Coordinates (Angstroms) |           |           |
|------------------|-------------------------|-----------|-----------|
|                  | X                       | Y         | Z         |
| 6                | -1.426929               | -0.963318 | 0.220454  |
| 6                | -0.006406               | -1.190801 | -0.219375 |
| 6                | 0.812225                | 0.096957  | -0.048920 |
| 6                | 2.129848                | 0.160267  | 0.128328  |
| 6                | -0.109243               | 1.207347  | -0.093256 |
| 6                | -1.343101               | 1.285357  | -0.038925 |
| 1                | -2.305397               | 1.750035  | -0.011611 |
| 1                | 2.636698                | 1.112620  | 0.215104  |
| 1                | 0.469089                | -2.004227 | 0.336755  |
| 1                | 0.010674                | -1.460554 | -1.279134 |
| 1                | 2.726037                | -0.742898 | 0.189472  |
| 1                | -2.238504               | -1.275629 | -0.423967 |
| 1                | -1.636966               | -0.954199 | 1.283548  |

### TS19

Standard orientation:

| Atomic<br>Number | Coordinates (Angstroms) |           |           |
|------------------|-------------------------|-----------|-----------|
|                  | X                       | Y         | Z         |
| 6                | -1.565776               | -1.308138 | -0.170839 |
| 6                | -1.323858               | 0.002579  | 0.034809  |
| 6                | 0.027754                | 0.608912  | -0.021803 |
| 6                | 0.196504                | 1.933467  | -0.109552 |
| 6                | 1.158270                | -0.275360 | 0.014547  |
| 6                | 2.088352                | -1.035213 | 0.047902  |
| 1                | 2.920395                | -1.697568 | 0.079543  |
| 1                | 1.183948                | 2.371991  | -0.164812 |
| 1                | -2.145294               | 0.712555  | 0.007556  |
| 1                | -1.452592               | 0.163542  | 1.895358  |
| 1                | -0.660511               | 2.596957  | -0.124003 |
| 1                | -2.579594               | -1.683048 | -0.221020 |
| 1                | -0.753821               | -2.021911 | -0.243010 |

## TS20

Standard orientation:

| Atomic<br>Number | Coordinates (Angstroms) |           |           |
|------------------|-------------------------|-----------|-----------|
|                  | X                       | Y         | Z         |
| 6                | 1.373001                | -0.609447 | -0.465088 |
| 6                | 0.201824                | -0.888313 | 0.487297  |
| 6                | -0.901013               | 0.028067  | 0.141863  |
| 6                | -2.106123               | 0.000049  | -0.391883 |
| 6                | 0.117160                | 0.953928  | 0.696869  |
| 6                | 1.194686                | 0.874318  | -0.318903 |
| 1                | 1.780150                | 1.690653  | -0.711428 |
| 1                | -2.673652               | 0.913678  | -0.521829 |
| 1                | 0.047316                | -1.775371 | 1.096066  |
| 1                | 0.548764                | -0.046354 | 1.473257  |
| 1                | -2.552589               | -0.932973 | -0.714050 |
| 1                | 2.329224                | -0.957225 | -0.060514 |
| 1                | 1.243577                | -1.044022 | -1.462426 |

## TS21

Standard orientation:

| Atomic<br>Number | Coordinates (Angstroms) |           |           |
|------------------|-------------------------|-----------|-----------|
|                  | X                       | Y         | Z         |
| 6                | 1.373001                | -0.609447 | -0.465088 |
| 6                | 0.201824                | -0.888313 | 0.487297  |
| 6                | -0.901013               | 0.028067  | 0.141863  |
| 6                | -2.106123               | 0.000049  | -0.391883 |
| 6                | 0.117160                | 0.953928  | 0.696869  |
| 6                | 1.194686                | 0.874318  | -0.318903 |
| 1                | 1.780150                | 1.690653  | -0.711428 |
| 1                | -2.673652               | 0.913678  | -0.521829 |
| 1                | 0.047316                | -1.775371 | 1.096066  |
| 1                | 0.548764                | -0.046354 | 1.473257  |
| 1                | -2.552589               | -0.932973 | -0.714050 |
| 1                | 2.329224                | -0.957225 | -0.060514 |
| 1                | 1.243577                | -1.044022 | -1.462426 |

## TS22

Standard orientation:

| Atomic<br>Number | Coordinates (Angstroms) |           |           |
|------------------|-------------------------|-----------|-----------|
|                  | X                       | Y         | Z         |
| 6                | 0.475478                | 1.678227  | 0.000002  |
| 6                | -0.783130               | 1.214890  | -0.000007 |
| 6                | -0.704780               | -0.242738 | 0.000008  |
| 6                | -1.582462               | -1.248077 | -0.000002 |
| 6                | 0.755604                | -0.453446 | 0.000036  |
| 6                | 1.914255                | -0.926766 | -0.000053 |
| 1                | 2.670314                | -1.684353 | 0.000089  |
| 1                | -1.258039               | -2.280817 | 0.000023  |
| 1                | -1.726406               | 1.752688  | -0.000015 |
| 1                | -2.645934               | -1.046500 | -0.000043 |
| 1                | 0.707747                | 2.745749  | -0.000002 |
| 1                | 1.802520                | 0.380694  | 0.000044  |



TS23  
Standard orientation:

| Atomic<br>Number | Coordinates (Angstroms) |           |           |
|------------------|-------------------------|-----------|-----------|
|                  | X                       | Y         | Z         |
| 6                | 2.149960                | -0.795256 | -0.324159 |
| 6                | 1.522000                | 0.377834  | 0.437153  |
| 6                | 0.089261                | 0.526781  | 0.128531  |
| 6                | -0.943255               | 1.209716  | -0.278824 |
| 6                | -1.588736               | -0.040087 | -0.039784 |
| 6                | -2.333069               | -1.022512 | 0.100372  |
| 1                | 2.073668                | -0.639983 | -1.401266 |
| 1                | 1.636734                | -1.725731 | -0.078168 |
| 1                | 3.204283                | -0.896596 | -0.063152 |
| 1                | -2.708652               | -1.995669 | 0.311934  |
| 1                | 1.622534                | 0.214404  | 1.514624  |
| 1                | 2.044271                | 1.313950  | 0.201073  |
| 1                | -1.249810               | 2.190766  | -0.624774 |

TS24

Standard orientation:

| Atomic<br>Number | Coordinates (Angstroms) |           |           |
|------------------|-------------------------|-----------|-----------|
|                  | X                       | Y         | Z         |
| 6                | 1.967677                | -0.794123 | -0.350121 |
| 6                | 1.376893                | 0.361026  | 0.460593  |
| 6                | -0.056603               | 0.585001  | 0.110931  |
| 6                | -0.936797               | 1.453566  | -0.298702 |
| 6                | -1.208491               | -0.266593 | 0.061986  |
| 6                | -2.068379               | -1.157950 | 0.085571  |
| 1                | 1.944285                | -0.568834 | -1.417781 |
| 1                | 1.393741                | -1.707927 | -0.184856 |
| 1                | 3.002527                | -0.979371 | -0.059060 |
| 1                | -2.972657               | -1.715486 | 0.020748  |
| 1                | 1.432706                | 0.132570  | 1.529178  |
| 1                | 1.925404                | 1.289567  | 0.289916  |
| 1                | -1.171800               | 2.463914  | -0.599691 |

**Table S2** Harmonic vibartional frequencies for the transition states

| TS1      | TS2      | TS3       | TS4      | TS5       | TS6      | TS7       | TS8       |
|----------|----------|-----------|----------|-----------|----------|-----------|-----------|
| -948.716 | -847.963 | -1803.22  | -609.677 | -955.9673 | -1072.61 | -636.975  | -1748.97  |
| 53.0518  | 81.2782  | 72.5634   | 67.3681  | 98.1615   | 95.9579  | 103.7277  | 108.7606  |
| 98.9411  | 128.0379 | 127.606   | 89.3034  | 133.3278  | 119.0338 | 174.1906  | 175.1613  |
| 122.1888 | 165.3571 | 207.5971  | 101.1085 | 263.6634  | 189.8283 | 190.1882  | 288.7041  |
| 232.7806 | 221.9716 | 346.2072  | 167.8057 | 310.9121  | 244.3284 | 274.3884  | 329.3853  |
| 266.2083 | 287.4922 | 404.7056  | 350.3492 | 402.2354  | 384.8788 | 358.1118  | 475.4046  |
| 321.7525 | 430.1604 | 504.1378  | 351.897  | 438.7522  | 451.4844 | 456.9741  | 557.0386  |
| 461.7462 | 450.5018 | 569.6724  | 394.3442 | 465.6492  | 494.2771 | 541.4022  | 649.0577  |
| 539.227  | 486.6677 | 662.4051  | 502.1214 | 511.3279  | 511.7683 | 547.7211  | 653.0912  |
| 560.7023 | 566.0666 | 718.4373  | 558.9416 | 673.7093  | 535.4134 | 562.4768  | 722.0129  |
| 571.8901 | 629.6506 | 726.9614  | 606.128  | 686.1948  | 744.6686 | 762.9923  | 745.6097  |
| 697.927  | 696.5603 | 797.8621  | 679.8407 | 711.5684  | 771.9497 | 800.4487  | 827.4106  |
| 708.7801 | 731.3928 | 836.6502  | 717.6262 | 726.3413  | 785.0415 | 814.4556  | 901.9914  |
| 715.4387 | 794.693  | 909.5331  | 723.5903 | 800.1124  | 908.3137 | 903.1846  | 937.4524  |
| 777.313  | 878.4457 | 967.3852  | 813.0256 | 901.1218  | 980.0548 | 989.5219  | 979.3682  |
| 970.1405 | 940.7143 | 1011.2551 | 890.5613 | 929.7975  | 1040.872 | 1060.3824 | 1030.9916 |
| 1088.077 | 991.1875 | 1050.7661 | 930.0496 | 983.4336  | 1116.718 | 1134.6618 | 1097.8582 |
| 1095.813 | 1062.801 | 1093.0778 | 946.7375 | 1003.9307 | 1244.925 | 1228.0707 | 1186.8533 |
| 1167.917 | 1095.763 | 1188.1524 | 1038.849 | 1078.3837 | 1405.114 | 1396.0487 | 1271.6575 |
| 1280.293 | 1143.35  | 1224.3558 | 1108.535 | 1157.2994 | 1425.051 | 1427.9232 | 1332.1342 |
| 1349.08  | 1286.296 | 1242.4404 | 1333.718 | 1255.0292 | 1477.104 | 1487.0413 | 1424.8056 |
| 1414.293 | 1408.023 | 1328.8101 | 1425.023 | 1299.8629 | 1505.852 | 1514.0398 | 1522.059  |
| 1467.284 | 1423.935 | 1425.5857 | 1429.483 | 1380.6734 | 1859.463 | 1907.7674 | 1742.5989 |
| 1499.227 | 1489.794 | 1485.6439 | 1452.389 | 1463.3903 | 2147.993 | 2158.5575 | 1818.5299 |
| 1507.162 | 1502.011 | 1641.9641 | 1950.305 | 1612.2056 | 2561.79  | 2376.6121 | 2221.3409 |
| 2163.139 | 2011.728 | 1922.3025 | 2238.837 | 1697.837  | 3034.942 | 3052.5037 | 3093.7314 |
| 2319.011 | 2243.838 | 2220.5765 | 3103.638 | 2231.8636 | 3094.64  | 3114.6395 | 3176.9535 |
| 3034.699 | 3058.816 | 3090.0316 | 3109.577 | 3154.8355 | 3135.528 | 3134.3084 | 3183.3899 |
| 3061.61  | 3132.099 | 3117.5032 | 3131.611 | 3168.0164 | 3148.525 | 3177.0155 | 3198.1556 |
| 3083.874 | 3136.04  | 3148.3738 | 3216.228 | 3176.5445 | 3475.791 | 3482.1765 | 3486.1276 |
| 3142.417 | 3138.457 | 3188.1097 | 3263.083 | 3193.222  |          |           |           |
| 3148.029 | 3154.781 | 3236.1835 | 3276.183 | 3259.1256 |          |           |           |
| 3482.708 | 3487.352 | 3484.9267 | 3471.994 | 3484.3954 |          |           |           |

| TS9      | TS10     | TS11      | TS12      | TS13     | TS14     | TS15     | TS16     |
|----------|----------|-----------|-----------|----------|----------|----------|----------|
| -651.04  | -1141.61 | -1986.696 | -1654.26  | -652.565 | -787.236 | -1655.81 | -843.884 |
| 131.2635 | 98.4965  | 119.9126  | 96.119    | 34.286   | 104.341  | 142.901  | -88.305  |
| 257.0691 | 177.067  | 164.053   | 165.834   | 137.846  | 189.090  | 164.350  | 128.919  |
| 430.9738 | 314.442  | 214.9216  | 248.973   | 147.505  | 226.839  | 184.147  | 200.845  |
| 463.7892 | 449.777  | 231.0852  | 445.434   | 207.772  | 251.611  | 241.224  | 219.246  |
| 549.762  | 493.217  | 344.0346  | 513.872   | 264.840  | 403.713  | 376.012  | 396.153  |
| 568.4372 | 518.638  | 527.463   | 525.770   | 276.134  | 561.736  | 543.663  | 632.464  |
| 672.0256 | 594.173  | 561.4578  | 549.137   | 470.460  | 602.053  | 633.951  | 643.844  |
| 793.4419 | 755.901  | 603.2232  | 641.984   | 512.335  | 664.356  | 706.711  | 693.645  |
| 816.8426 | 784.310  | 706.6652  | 704.260   | 541.801  | 692.831  | 743.997  | 754.191  |
| 819.9302 | 789.092  | 721.3341  | 724.313   | 607.012  | 735.314  | 768.066  | 870.831  |
| 846.8311 | 950.37   | 738.6703  | 775.652   | 699.209  | 793.719  | 832.671  | 884.846  |
| 1092.521 | 1043.101 | 779.3878  | 834.937   | 717.507  | 832.825  | 897.246  | 932.202  |
| 1252.175 | 1294.936 | 830.2208  | 865.167   | 726.177  | 939.738  | 1000.81  | 963.42   |
| 1457.141 | 1477.328 | 948.385   | 949.580   | 818.366  | 952.924  | 1005.882 | 988.499  |
| 1887.255 | 1909.792 | 1019.3306 | 1007.720  | 830.051  | 1006.145 | 1056.891 | 1013.59  |
| 2162.011 | 2146.557 | 1065.4115 | 1075.502  | 900.122  | 1071.848 | 1114.119 | 1141.488 |
| 2404.986 | 2583.624 | 1090.1956 | 1100.806  | 1031.909 | 1124.011 | 1151.418 | 1164.324 |
| 3187.861 | 3134.027 | 1157.0134 | 1190.201  | 1080.269 | 1240.203 | 1161.540 | 1258.528 |
| 3286.104 | 3247.618 | 1223.8789 | 1220.282  | 1213.317 | 1346.86  | 1323.899 | 1305.976 |
| 3481.218 | 3485.968 | 1334.0285 | 1269.357  | 1399.233 | 1407.834 | 1339.972 | 1383.679 |
|          |          | 1405.9912 | 1308.441  | 1471.679 | 1433.868 | 1407.23  | 1415.780 |
|          |          | 1486.058  | 1450.994  | 1483.971 | 1482.558 | 1438.243 | 1449.643 |
|          |          | 1488.8292 | 1488.406  | 1493.332 | 1486.27  | 1478.583 | 1467.566 |
|          |          | 1674.6648 | 1648.914  | 1961.627 | 1737.140 | 1481.906 | 1484.814 |
|          |          | 1882.2675 | 1708.027  | 2263.94  | 1769.686 | 1747.275 | 1708.701 |
|          |          | 2239.015  | 2235.719  | 3013.099 | 3008.852 | 2323.473 | 2221.509 |
|          |          | 3029.740  | 3055.916  | 3083.632 | 3086.432 | 3015.492 | 3017.593 |
|          |          | 3100.990  | 3095.34   | 3127.481 | 3140.476 | 3100.582 | 3073.483 |
|          |          | 3120.935  | 3113.114  | 3132.862 | 3155.236 | 3141.538 | 3124.425 |
|          |          | 3138.577  | 3197.392  | 3229.817 | 3185.444 | 3152.528 | 3147.785 |
|          |          | 3172.135  | 3226.301  | 3451.198 | 3250.651 | 3203.750 | 3170.649 |
|          |          | 3483.166  | 3487.5748 | 3487.613 | 3370.345 | 3252.758 | 3246.314 |

| TS17     | TS18     | TS19     | TS20     | TS21     | TS22     | TS23      | TS24      |
|----------|----------|----------|----------|----------|----------|-----------|-----------|
| -487.826 | -646.528 | -935.214 | -1273.16 | -706.876 | -1899.54 | -752.2753 | -787.0664 |
| 163.807  | 106.8924 | 93.4274  | 178.557  | 182.865  | 178.9863 | 47.8614   | 51.7173   |
| 178.074  | 247.2837 | 166.036  | 271.612  | 269.963  | 244.6523 | 115.1527  | 152.7107  |
| 242.014  | 361.7404 | 251.715  | 325.068  | 308.796  | 266.33   | 166.9357  | 195.4556  |
| 256.908  | 455.6298 | 316.578  | 392.678  | 340.835  | 310.4325 | 258.5355  | 270.2304  |
| 335.692  | 509.1513 | 379.956  | 599.134  | 518.101  | 480.6958 | 368.0508  | 356.4888  |
| 409.048  | 553.7765 | 453.6504 | 639.402  | 631.713  | 485.9297 | 423.2086  | 436.9748  |
| 694.420  | 605.1555 | 487.294  | 693.019  | 678.171  | 550.188  | 442.1654  | 466.4115  |
| 716.992  | 687.7975 | 529.722  | 783.618  | 693.893  | 659.6533 | 495.5809  | 541.6204  |
| 735.921  | 696.038  | 624.660  | 847.990  | 793.826  | 680.5091 | 566.0592  | 605.3662  |
| 780.544  | 749.9197 | 705.091  | 897.301  | 810.233  | 696.1482 | 773.4298  | 692.7134  |
| 786.832  | 794.2807 | 722.748  | 921.964  | 813.434  | 731.998  | 807.9277  | 721.8873  |
| 838.262  | 818.5569 | 736.243  | 947.760  | 915.9452 | 769.1038 | 820.8221  | 750.2099  |
| 915.125  | 858.5215 | 756.198  | 960.762  | 957.9286 | 783.3278 | 955.6906  | 794.1358  |
| 923.777  | 943.4935 | 764.28   | 993.0678 | 965.6996 | 915.8572 | 1018.3759 | 971.8121  |
| 925.066  | 946.8632 | 938.788  | 1007.882 | 969.3995 | 925.5192 | 1086.7324 | 1062.1758 |
| 934.317  | 1053.042 | 948.027  | 1041.350 | 980.8435 | 978.9403 | 1092.3092 | 1091.5301 |
| 968.417  | 1080.113 | 960.667  | 1109.186 | 1003.895 | 1006.678 | 1162.0215 | 1193.7994 |
| 1073.052 | 1215.41  | 1043.696 | 1163.919 | 1091.383 | 1227.818 | 1273.0382 | 1291.2814 |
| 1156.394 | 1253.699 | 1057.299 | 1203.158 | 1106.295 | 1294.429 | 1326.8256 | 1338.7019 |
| 1217.871 | 1309.651 | 1304.181 | 1278.467 | 1254.076 | 1437.962 | 1409.5003 | 1411.7069 |
| 1297.207 | 1436.925 | 1322.976 | 1283.973 | 1352.94  | 1576.846 | 1467.6955 | 1477.4285 |
| 1433.149 | 1458.826 | 1415.571 | 1339.111 | 1368.058 | 1709.706 | 1499.7388 | 1501.2952 |
| 1452.223 | 1479.183 | 1455.247 | 1449.764 | 1454.178 | 1963.804 | 1508.4332 | 1507.2245 |
| 1571.056 | 1727.264 | 1619.911 | 1469.840 | 1533.659 | 2167.023 | 1817.7509 | 1765.0681 |
| 1718.727 | 1939.39  | 1705.255 | 1811.998 | 1628.478 | 3115.522 | 1916.9777 | 1940.5921 |
| 1794.358 | 3063.492 | 2246.056 | 2059.916 | 1714.203 | 3169.544 | 3016.7147 | 3054.1936 |
| 3157.031 | 3109.271 | 3157.922 | 3049.054 | 3151.672 | 3169.748 | 3058.0338 | 3059.744  |
| 3157.825 | 3150.636 | 3163.551 | 3090.040 | 3211.644 | 3264.614 | 3078.4406 | 3106.5012 |
| 3216.31  | 3158.531 | 3164.929 | 3143.651 | 3231.288 | 3371.945 | 3138.307  | 3134.0523 |
| 3247.666 | 3253.4   | 3259.633 | 3145.729 | 3243.265 |          | 3142.1456 | 3138.9741 |
| 3250.907 | 3254.771 | 3261.276 | 3238.253 | 3245.221 |          | 3176.3527 | 3253.5878 |
| 3256.053 | 3392.622 | 3485.186 | 3242.536 | 3255.196 |          | 3447.6091 | 3447.8858 |

**Table S3** Structure dependent rate constants for barrier less terminal association

| T (K) | 2.02     | 2.12     | 2.22     | 2.32     | 2.42      | 2.52      |
|-------|----------|----------|----------|----------|-----------|-----------|
| 70    | 1.149E39 | 3.514E20 | 4.789E10 | 103500   | 234.1     | 27.45     |
| 80    | 3.192E32 | 2.143E16 | 4.332E7  | 496.8    | 2.566     | 0.4       |
| 90    | 2.561E27 | 1.144E13 | 186700   | 7.872    | 0.07765   | 0.01513   |
| 100   | 2.165E23 | 2.792E10 | 2404     | 0.288    | 0.00478   | 0.00111   |
| 110   | 1.015E20 | 2.056E8  | 68.61    | 0.01937  | 4.939E-4  | 1.334E-4  |
| 120   | 1.719E17 | 3.468E6  | 3.559    | 0.00206  | 7.509E-5  | 2.294E-5  |
| 130   | 7.826E14 | 110600   | 0.2924   | 3.1E-4   | 1.537E-5  | 5.212E-6  |
| 140   | 7.743E12 | 5820     | 0.03448  | 6.159E-5 | 3.971E-6  | 1.474E-6  |
| 150   | 1.426E11 | 456.8    | 0.00543  | 1.525E-5 | 1.236E-6  | 4.961E-7  |
| 160   | 4.348E9  | 49.61    | 0.00108  | 4.518E-6 | 4.476E-7  | 1.924E-7  |
| 170   | 2.009E8  | 7.04     | 2.609E-4 | 1.551E-6 | 1.835E-7  | 8.381E-8  |
| 180   | 1.312E7  | 1.248    | 7.404E-5 | 6.017E-7 | 8.342E-8  | 4.022E-8  |
| 190   | 1.147E6  | 0.2668   | 2.406E-5 | 2.588E-7 | 4.136E-8  | 2.094E-8  |
| 200   | 128500   | 0.06687  | 8.771E-6 | 1.215E-7 | 2.208E-8  | 1.168E-8  |
| 210   | 17790    | 0.01921  | 3.53E-6  | 6.153E-8 | 1.256E-8  | 6.909E-9  |
| 220   | 2958     | 0.00621  | 1.547E-6 | 3.323E-8 | 7.54E-9   | 4.302E-9  |
| 230   | 577      | 0.00222  | 7.303E-7 | 1.899E-8 | 4.747E-9  | 2.8E-9    |
| 240   | 129.4    | 8.69E-4  | 3.678E-7 | 1.14E-8  | 3.114E-9  | 1.894E-9  |
| 250   | 32.78    | 3.678E-4 | 1.961E-7 | 7.145E-9 | 2.119E-9  | 1.325E-9  |
| 260   | 9.259    | 1.669E-4 | 1.1E-7   | 4.654E-9 | 1.489E-9  | 9.555E-10 |
| 270   | 2.88     | 8.052E-5 | 6.45E-8  | 3.135E-9 | 1.076E-9  | 7.075E-10 |
| 280   | 0.9761   | 4.105E-5 | 3.937E-8 | 2.178E-9 | 7.978E-10 | 5.365E-10 |
| 290   | 0.3574   | 2.199E-5 | 2.491E-8 | 1.554E-9 | 6.051E-10 | 4.156E-10 |
| 300   | 0.1402   | 1.231E-5 | 1.628E-8 | 1.136E-9 | 4.684E-10 | 3.281E-10 |

**Table S4** Structure dependent rate constants for barrier less central association

| T(K) | 2.03     | 2.13     | 2.23     | 2.33      | 2.43      | 2.53      |
|------|----------|----------|----------|-----------|-----------|-----------|
| 70   | 6.733E32 | 8.403E14 | 145700   | 31.13     | 3.732     | 3.581     |
| 80   | 1.031E27 | 2.35E11  | 702.8    | 0.4499    | 0.07397   | 0.07502   |
| 90   | 3.11E22  | 4.092E8  | 11.26    | 0.01697   | 0.00358   | 0.0038    |
| 100  | 7.573E18 | 2.565E6  | 0.4185   | 0.00125   | 3.225E-4  | 3.575E-4  |
| 110  | 8.425E15 | 40830    | 0.02867  | 1.509E-4  | 4.575E-5  | 5.259E-5  |
| 120  | 2.931E13 | 1308     | 0.00311  | 2.618E-5  | 9.111E-6  | 1.081E-5  |
| 130  | 2.451E11 | 71.75    | 4.788E-4 | 6.018E-6  | 2.354E-6  | 2.873E-6  |
| 140  | 4.083E9  | 6.007    | 9.735E-5 | 1.724E-6  | 7.46E-7   | 9.334E-7  |
| 150  | 1.181E8  | 0.7052   | 2.469E-5 | 5.89E-7   | 2.782E-7  | 3.559E-7  |
| 160  | 5.348E6  | 0.109    | 7.493E-6 | 2.321E-7  | 1.184E-7  | 1.545E-7  |
| 170  | 350300   | 0.02111  | 2.636E-6 | 1.028E-7  | 5.614E-8  | 7.458E-8  |
| 180  | 31210    | 0.00494  | 1.048E-6 | 5.021E-8  | 2.913E-8  | 3.933E-8  |
| 190  | 3604     | 0.00135  | 4.623E-7 | 2.661E-8  | 1.63E-8   | 2.233E-8  |
| 200  | 518.5    | 4.243E-4 | 2.225E-7 | 1.512E-8  | 9.726E-9  | 1.35E-8   |
| 210  | 90.11    | 1.493E-4 | 1.155E-7 | 9.114E-9  | 6.129E-9  | 8.612E-9  |
| 220  | 18.43    | 5.805E-5 | 6.391E-8 | 5.782E-9  | 4.049E-9  | 5.753E-9  |
| 230  | 4.344    | 2.461E-5 | 3.742E-8 | 3.835E-9  | 2.786E-9  | 3.999E-9  |
| 240  | 1.159    | 1.125E-5 | 2.301E-8 | 2.643E-9  | 1.986E-9  | 2.878E-9  |
| 250  | 0.3448   | 5.498E-6 | 1.477E-8 | 1.885E-9  | 1.461E-9  | 2.136E-9  |
| 260  | 0.113    | 2.849E-6 | 9.848E-9 | 1.385E-9  | 1.105E-9  | 1.628E-9  |
| 270  | 0.04034  | 1.556E-6 | 6.792E-9 | 1.045E-9  | 8.562E-10 | 1.271E-9  |
| 280  | 0.01554  | 8.9E-7   | 4.826E-9 | 8.072E-10 | 6.78E-10  | 1.013E-9  |
| 290  | 0.00641  | 5.307E-7 | 3.523E-9 | 6.368E-10 | 5.473E-10 | 8.233E-10 |
| 300  | 0.00282  | 3.286E-7 | 2.634E-9 | 5.12E-10  | 4.496E-10 | 6.803E-10 |

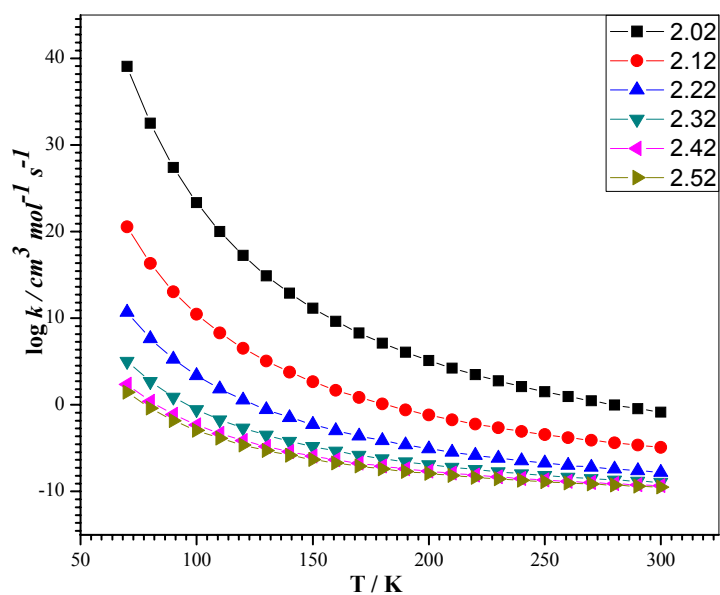

**Figure S1** Variation of rate constant as a function of temperature and position for terminal barrier-less  $C_2H + 1$ -butyne addition

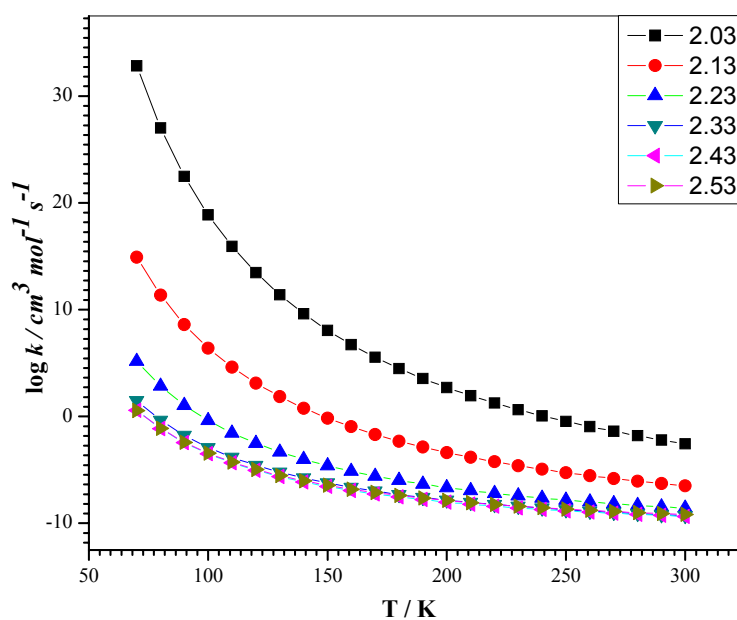

**Figure S2** Variation of rate constant as a function of temperature and position for central barrier-less  $C_2H + 1$ -butyne addition

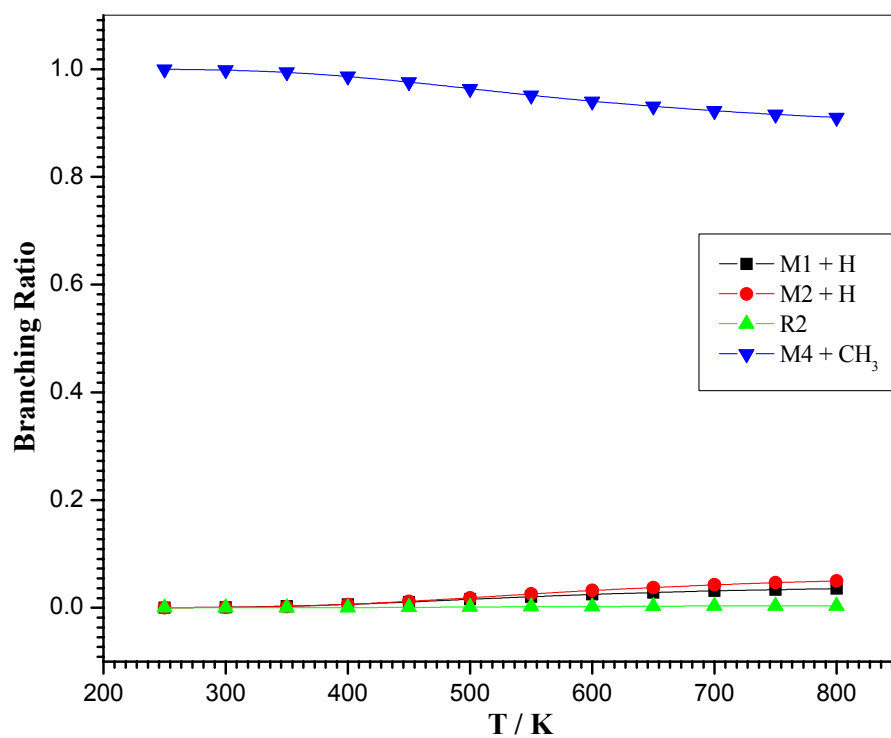

**Figure S3** Branching ratio for the initial reactions of R1
